# Supplementary material
Source: PubMed Central journal article supplement (PMC4559816)
Supplement: cr201594x3.pdf [file cr201594x3.pdf]

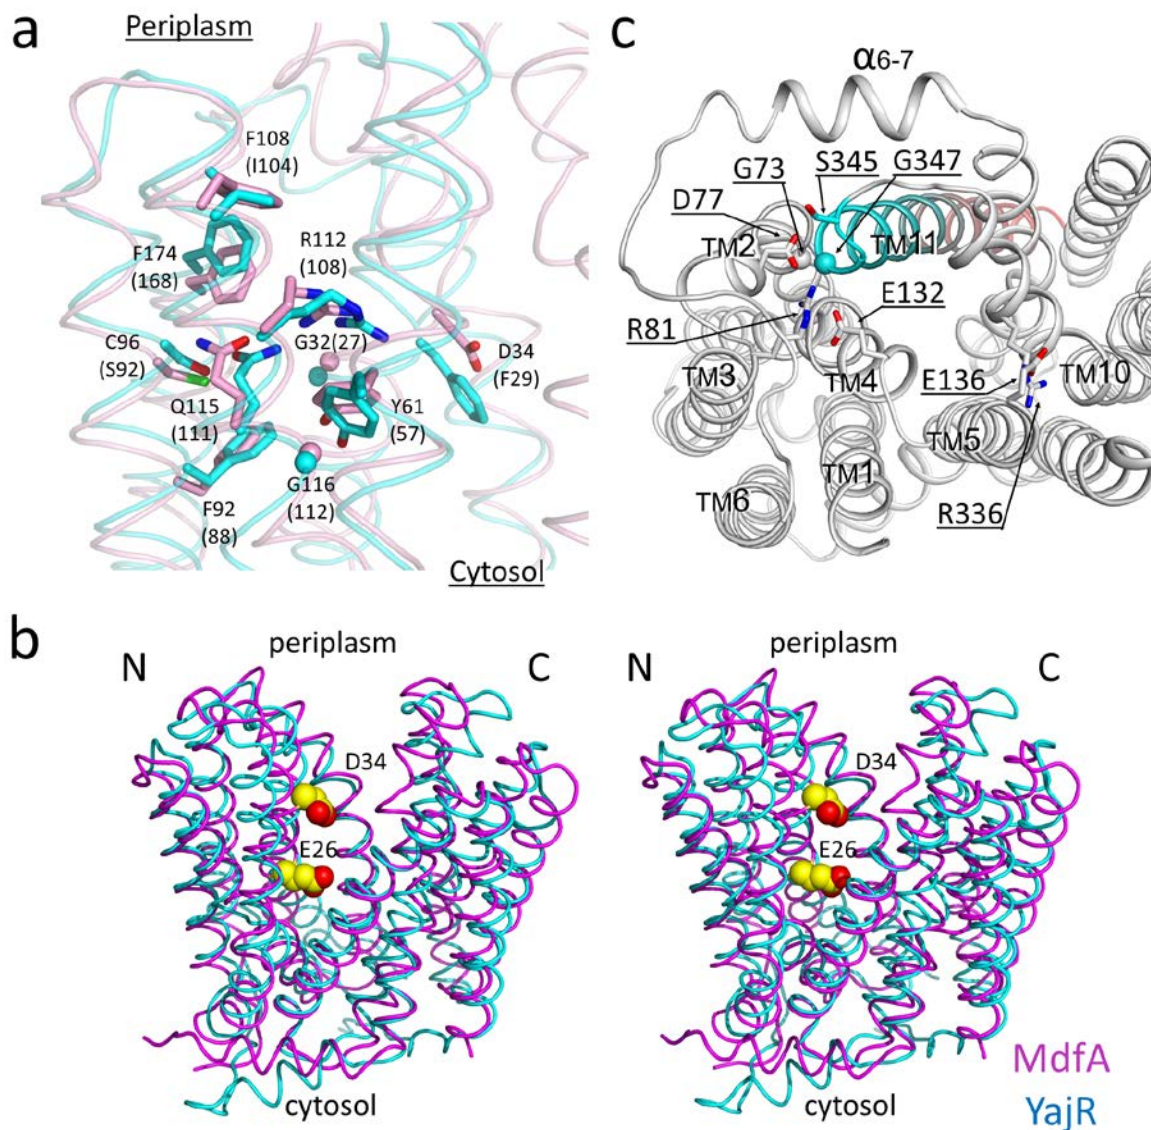

*Figure S3. Structural comparison between MdfA and YajR.*

(a) Superposition of motif-B from MdfA (magenta) and YajR (cyan; PDB ID: 3WDO). Side chains of the residues of the “3D motif-B” are shown as stick models and labelled. YajR numbers are in parentheses. (b) A putative model of the C<sub>Out</sub> conformation of MdfA. Structure superposition of MdfA and YajR is shown in stereo view. The N- and C-domains of MdfA are individually superimposed on the corresponding domains of YajR in its C<sub>Out</sub> conformation. The rmsd is 1.7 Å for 153 C $\alpha$ -atom pairs between the N-domains of MdfA and YajR (using a 3.0-Å cut-off), and that between the C-domains is 2.0 for 132 C $\alpha$ -

atom pairs. The titratable residues E26 and D34, both inside the cavity of MdfA, are shown as sphere models. (c) Modelling of the motif-A of MdfA in the C<sub>Out</sub> state. D77 and the N-terminal of TM11 form a charge-dipole interaction, potentially stabilizing the C<sub>Out</sub> state. The helix dipole of TM11 is shown in a colour gradient, from the N-terminal in cyan to the C-terminal in red. D77, R81, and E132 form a charge-relay triad, potentially regulating the charge-dipole interaction. Similar interactions were first reported in the crystal structure of the C<sub>Out</sub> state of YajR [6].
