# Supplementary material
Source: PubMed Central journal article supplement (PMC4559816)
Supplement: cr201594x5.pdf [file cr201594x5.pdf]

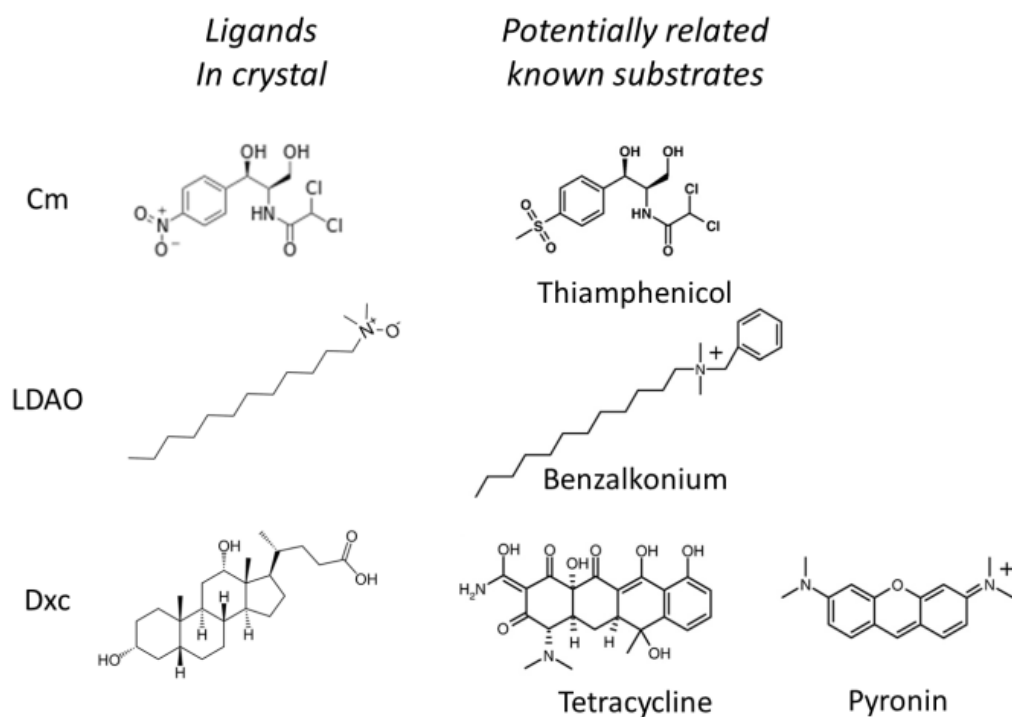

*Figure S5. Actual ligands in our crystal structures in comparison to related known substrates.*

Chloramphenicol (Cm): MW, 323 Da; electroneutral; and size:  $\sim 260 \text{ \AA}^3$ . N-dodecyl-N,N-dimethylamine-N-oxide (LDAO): MW, 229 Da; positively charged; and size:  $\sim 235 \text{ \AA}^3$ . Deoxycholate (Dxc): MW, 391 Da; negatively charged; and size:  $\sim 360 \text{ \AA}^3$ . Potential homologues are selected from a previous report [17].
