# Supplementary material
Source: PubMed Central journal article supplement (PMC4559816)
Supplement: cr201594x7.pdf [file cr201594x7.pdf]

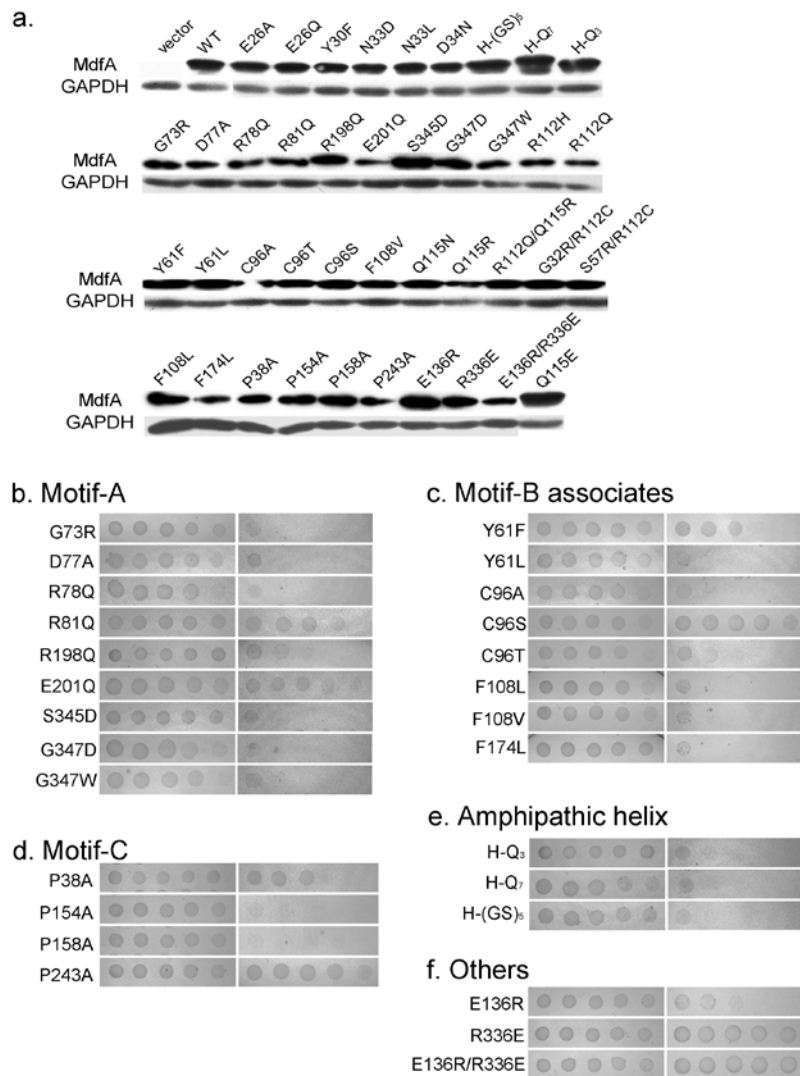

*Figure S7. Chloramphenicol-resistance assay.*

(a) Anti-histidine western blots of MdfA mutants (associated with Fig. 4) are shown, with glyceraldehyde 3-phosphate dehydrogenase (GAPDH) as an internal control. (b-f) Results of Cm-resistance assay for motifs-A and C and others are shown.
