# Supplementary material
Source: PubMed Central journal article supplement (PMC4559816)
Supplement: cr201594x9.pdf [file cr201594x9.pdf]

## Tables

Table S1. Statistics of diffraction data and structure refinement

| Crystal                                   | MdfA-DXC (Se-peak) | MdfA-Cm             | MdfA-LDAO         | MdfA-DXC          |
|-------------------------------------------|--------------------|---------------------|-------------------|-------------------|
| <b>Data processing</b>                    |                    |                     |                   |                   |
| Beamline                                  | BL1A at KEK        | BL1A at KEK         | BL17U at SSRF     | BL17U at SSRF     |
| Wavelength (Å)                            | 0.9788             | 1.0000              | 0.8153            | 1.0000            |
| Space group                               | C2                 | C2                  | C2                | C2                |
| Cell dimensions                           |                    |                     |                   |                   |
| a, b, c (Å)                               | 94.2, 64.4, 101.3  | 93.9, 63.4, 99.7    | 94.1, 64.1, 101.3 | 94.7, 64.2, 101.4 |
| $\alpha$ , $\beta$ , $\gamma$ (°)         | 90, 109.7, 90      | 90, 106.1, 90       | 90, 104.2, 90     | 90, 110.0, 90     |
| Resolution (Å) <sup>a</sup>               | 50-3.0 (3.1-3.0)   | 50-2.45 (2.54-2.45) | 50-2.2 (2.3-2.2)  | 50-2.0 (2.1-2.0)  |
| Completeness (%)                          | 99.1 (93.7)        | 99.6 (97.3)         | 100.0 (100.0)     | 98.8 (95.4)       |
| Rmerge (%)                                | 13.0 (65.7)        | 11.6 (99.6)         | 12.8 (138.0)      | 17.2 (65.6)       |
| CC <sub>1/2</sub>                         | 0.994 (0.811)      | 0.998 (0.623)       | 0.995 (0.726)     | 0.986 (0.683)     |
| I / $\sigma$ (I)                          | 14.6 (2.2)         | 16.9 (1.7)          | 15.4 (1.8)        | 12.1 (1.7)        |
| Unique reflections                        | 11,581 (1,059)     | 21,233 (2,057)      | 29,691 (2,960)    | 38,240 (3,674)    |
| Redundancy                                | 11.7 (7.2)         | 6.4 (4.8)           | 8.6 (8.2)         | 3.4 (2.8)         |
| <b>Refinement</b>                         |                    |                     |                   |                   |
| Resolution (Å)                            |                    | 50-2.45             | 50-2.2            | 50-2.0            |
| Number of reflections (test) <sup>b</sup> |                    | 21,211 (1,051)      | 29,641 (1,473)    | 38,215 (1,891)    |
| Rwork / Rfree (%)                         |                    | 20.4/24.4           | 20.6/23.2         | 21.0/23.0         |
| Average B-factor (Å <sup>2</sup> )        |                    |                     |                   |                   |
| Protein                                   |                    | 56                  | 51                | 58                |
| Ligand (No. of atoms)                     |                    | 70 (20)             | 64 (16)           | 73 (28)           |
| Water (No. of atoms)                      |                    | 51 (14)             | 46 (16)           | 53 (18)           |
| R.m.s.d. from ideal geometry              |                    |                     |                   |                   |
| bond lengths (Å)                          |                    | 0.006               | 0.005             | 0.005             |
| bond angles (°)                           |                    | 1.044               | 1.044             | 1.039             |
| Ramachandran plot (%) <sup>c</sup>        |                    |                     |                   |                   |
| favored region                            |                    | 98.0                | 98.0              | 98.2              |
| allowed region                            |                    | 2.0                 | 2.0               | 1.8               |

<sup>a</sup>. Values in parentheses are for shells with the highest resolution.

<sup>b</sup>. All structures were refined with the same “test” set of R<sub>free</sub> reference reflections.

<sup>c</sup>. Calculated using *MolProbity*.
