# Supplementary material
Source: PubMed Central journal article supplement (PMC4559816)
Supplement: cr201594x10.pdf [file cr201594x10.pdf]

Table S2. Formation of ligand binding sites.

|                        | Cm  | Dxc | LDAO |
|------------------------|-----|-----|------|
| Y30 <sup>TM1.3</sup>   | 3.4 | 4.0 | 3.9  |
| N33 <sup>TM1.2</sup>   | 2.8 | 3.9 | 3.2  |
| D34 <sup>TM1.2</sup>   | 2.4 | 2.4 | 3.2  |
| M58 <sup>TM2.1</sup>   | 3.6 | 3.7 | 3.5  |
| L62 <sup>TM2.2</sup>   | 3.7 | 3.4 | 3.9  |
| L119 <sup>TM4.3</sup>  | 3.9 |     |      |
| A150 <sup>TM5.3</sup>  | 3.2 |     |      |
| L151 <sup>TM5.3</sup>  | 3.4 |     |      |
| P154 <sup>TM5.2</sup>  |     | 3.4 |      |
| S232 <sup>TM7.4</sup>  |     |     | 3.8  |
| L235 <sup>TM7.3</sup>  | 3.7 |     |      |
| L236 <sup>TM7.3</sup>  | 3.6 | 3.7 | 3.8  |
| I239 <sup>TM7.2</sup>  | 3.5 |     | 3.9  |
| L268 <sup>TM8.3</sup>  | 3.9 |     |      |
| S350 <sup>TM11.5</sup> |     | 3.9 |      |
| G354 <sup>TM11.4</sup> |     | 3.7 |      |
| Q357 <sup>TM11.4</sup> |     | 3.3 |      |
| M358 <sup>TM11.3</sup> |     | 3.5 |      |
| F361 <sup>TM11.3</sup> |     |     | 3.9  |

Closest distances (within 4.0 Å) between non-hydrogen atoms of the ligand and individual amino acid residues are reported. Colour code: green indicates short distances and red long distances. In the first column, residues from the N- and C-domains are highlighted in cyan and yellow, respectively.
