# Supplementary material
Source: PubMed Central journal article supplement (PMC4559816)
Supplement: cr201594x11.pdf [file cr201594x11.pdf]

Table S3. Bulk dye anisotropy measurements.

| Labeling position | No Cm | With Cm<br>(100 $\mu$ M) |
|-------------------|-------|--------------------------|
| Cy5               | 0.275 | 0.273                    |
| N374C             | 0.217 | 0.221                    |
| V167C             | 0.230 | 0.235                    |

Fluorescence anisotropy ( $r = (I_{\parallel} - I_{\perp}) / (I_{\parallel} + 2I_{\perp})$ ) was measured for Cy5 free in solution or chemically attached to several different substituted Cys in MdfA using a bulk fluorimeter (HITACHI F-7000). Error in measured anisotropy values (*i.e.* standard deviation of 3 measurements) was  $\leq 2\%$  in all cases.
