# Supplementary material
Source: PubMed Central journal article supplement (PMC4559816)

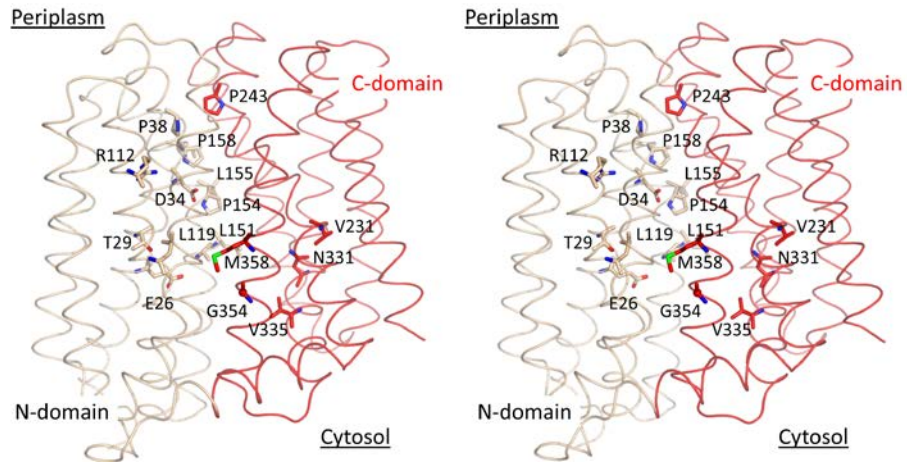

Figure S8. Stereo view of distribution of residues discussed in the main text.

Supplement: cr201594x8.pdf [file cr201594x8.pdf]
